# Supplementary material for: Warming increases soil respiration in a carbon-rich soil without changing microbial respiratory potential
Source: Copernicus journal article supplement (doi:10.5194/bg-17-4405-2020), 2020-09-02
Supplement: Supplementary file 1 [file bg-17-4405-2020-supplement.pdf]

Supplement of Biogeosciences, 17, 4405–4420, 2020  
<https://doi.org/10.5194/bg-17-4405-2020-supplement>  
© Author(s) 2020. This work is distributed under  
the Creative Commons Attribution 4.0 License.

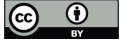

*Supplement of*

## **Warming increases soil respiration in a carbon-rich soil without changing microbial respiratory potential**

**Marion Nyberg and Mark J. Hovenden**

*Correspondence to:* Marion Nyberg (mnybe1@mail.ubc.ca)

The copyright of individual parts of the supplement might differ from the CC BY 4.0 License.

**Table Supplementary 1 Above ground biomass removal quantities at the Silver Plains Warming Experiment for all ambient dominant removal (ADR), warmed dominant removal (WDR), ambient random removal (ARR), and warmed random removal (WRR) plots.**

| Treatment | Block | Above ground biomass dry per plot (g) |
|-----------|-------|---------------------------------------|
| ADR       | 1     | 202.34                                |
| WDR       | 1     | 170.95                                |
| ARR       | 1     | 189.47                                |
| WRR       | 1     | 215.1                                 |
| ADR       | 2     | 112.11                                |
| WDR       | 2     | 296.1                                 |
| ADR       | 3     | 174.43                                |
| WDR       | 3     | 137.72                                |
| ARR       | 3     | 144.6                                 |
| WRR       | 3     | 153.51                                |
| ADR       | 4     | 48.15                                 |
| WDR       | 4     | 219.88                                |
| ADR       | 5     | 169.61                                |
| WDR       | 5     | 201.65                                |
| ARR       | 5     | 183.57                                |
| WRR       | 5     | 177.2                                 |
| ADR       | 6     | 77.99                                 |
| WDR       | 6     | 156.56                                |
| ADR       | 7     | 247.39                                |
| WDR       | 7     | 242.16                                |
| ARR       | 7     | 238.38                                |
| WRR       | 7     | 221.59                                |
| ADR       | 8     | 277.9                                 |
| WDR       | 8     | 213.94                                |

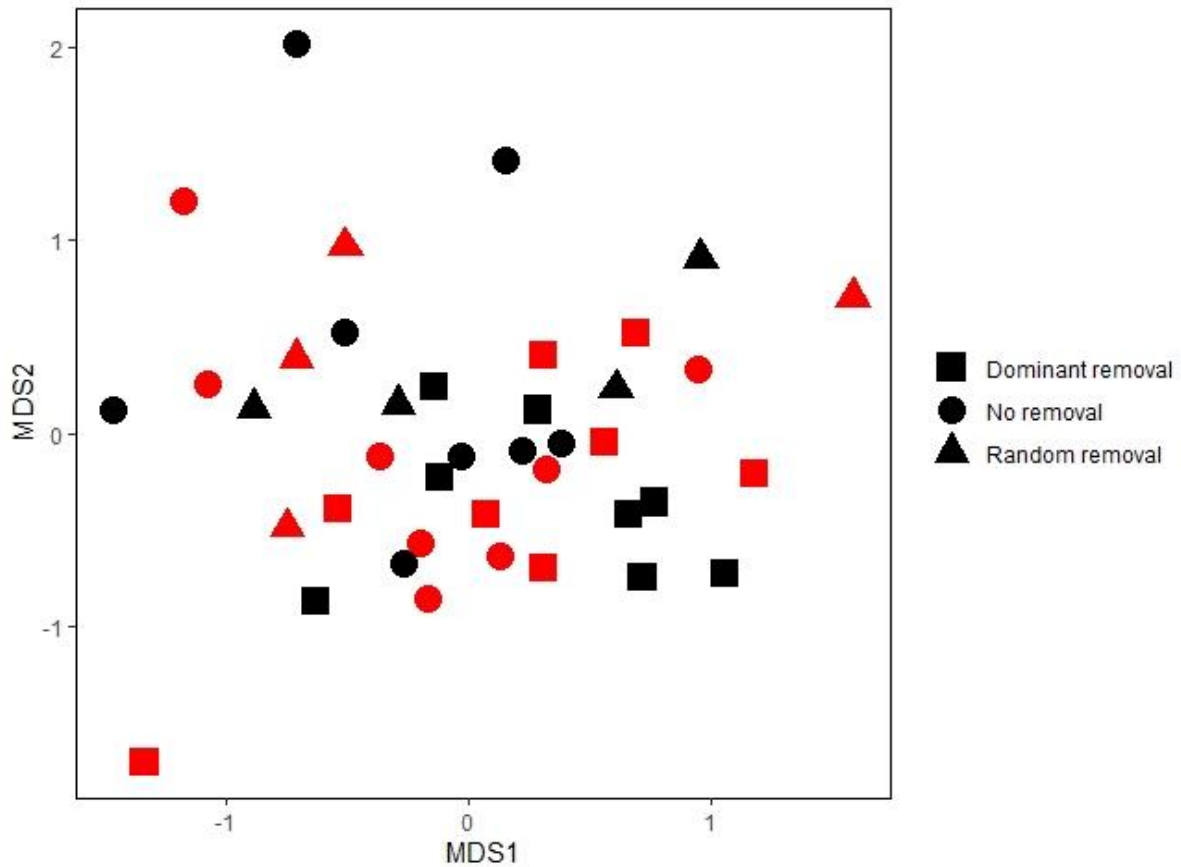

**Figure supplementary 1. Multidimensional scaling plot of treatment impacts on plant community composition in the Silver Plains warming experiment at the end of the first growing season after establishment (i.e. ~February 2015). Black symbols represent ambient plots while red symbols denote plots warmed by open-top chambers. Multidimensional scaling analyses were done using Bray-Curtis dissimilarity measures of fourth-root transformed point cover data for each plot. 2-dimensional stress value =0.17.**
